# Supplementary material for: Rapid on-site nucleic acid testing: On-chip sample preparation, amplification, and detection, and their integration into all-in-one systems
Source: Front Bioeng Biotechnol. 2023 Feb 1;11:1020430. doi: 10.3389/fbioe.2023.1020430 (PMC9930993; doi:10.3389/fbioe.2023.1020430)
Supplement: Supplementary file 1 [file Table1.xlsx]

## Sheet: PCR on chip
Chip structure	Driving force	Number of cycles	Single cycle time	Total time	Limit of detection	Flow rate or Temperature change rate	sample volume	Target	Potential to carry out high-throughput test	Reference
Static chamber	negative pressure	40	795s	/	/	/	10 mL of blood	epidermal growth factor receptor gene mutation	No	A Self-Priming Digital Polymerase Chain Reaction Chip for Multiplex Genetic Analysis
Static chamber	syringe pump	/	/	8min5s	/	0.1-2 μl min−1	50uL	Porphyromonas gingivalis (P.g), Tannerella forsythia (T.f) a n d Treponema denticola (T.d)	yes	A continuous flow PCR array microfluidic chip applied for simultaneous amplification of target genes of periodontal pathogens
Serpentine channel	liquid pump	40	90s	72min	/	0.4µL/min	5uL	Colla corii asini	No	A Portable Continuous-Flow Polymerase Chain Reaction Chip Device Integrated with Arduino Boards for Detecting Colla corii asini
serpentine microchannel together with spiral structure	syringe pump	27	120s	56min	/	/	0.5μL	3.329 kbp yeast expression vector	yes	Design and fabrication of a two-phase diamond nanoparticle aided fast PCR device
Serpentine channel	syringe pump	30	/	/	/	0.773-0.889 mm/s	/	/	NO	Ease Fabrication of PCR Modular Chip for Portable DNA Detection Kit
Serpentine channel	syringe pump	25	90s	56min	approximately 102 CFU	5 mL min-1	5ml milk	Escherichia coli O157:H7	NO	Fabrication of an integrated polystyrene microdevice for pre-concentration and amplification of Escherichia coli O157:H7 from raw milk
Serpentine channel	syringe pump	40	65s	48min20s	102 CFU/mL	0.25mL/min	12uL	Salmonella	No	Magnetic Bead Chain-Based Continuous-Flow DNA Extraction for Microfluidic PCR Detection of Salmonella
Serpentine channel	syringe pump	/	/	P.g and T.d at least：3′48″,T.f at least：8′25″	/	/	2uL	Porphyromonas gingivalis (P.g), Treponema denticola (T.d), and Tannerella forsythia (T.f)	No	Multiplex amplification of target genes of periodontal pathogens in continuous flow PCR microfluidic chip
Static chamber	/	40	60s	＜1h	1 copies/μL	/	5uL	Swine disease	yes	Multiplex and on-site PCR detection of swine diseases based on the microfluidic chip system
Serpentine channel	stepper motor	/	/	8min	/	0.001 to 0.02 m/s.	/	bacterial 16S ribosomal DNA	No	Design and fabrication of portable continuous flow PCR microfluidic chip for DNA replication
Static chamber	/	45	60s	45min*	50 copies	/	50uL	HPV	No	A Lab-on-a-Chip Device Integrated DNA Extraction and Solid Phase PCR Array for the Genotyping of High-Risk HPV in Clinical Samples
Static chamber	/	45	75s	66min 15s	/	heating (15°C/s) and cooling rates (10°C/s)	10uL	Hepatitis B virus	yes	An Innovative Silicon-chip for Sensitive Real Time PCR Improvement in Pathogens Detection
Serpentine channel	syringe pump	25	15s	<13 min	/	＜0.5 mL/hr	10uL	genetic markers	No	A disposable, continuous-flow polymerase chain reaction device: design, fabrication and evaluation
Serpentine channel	syringe pump	50	26s	/	/	/	10uL	Human Genomic DNA template		A Comprehensive Methodology for Design and Development of an Integrated Microheater for on-Chip DNA Amplification
Closed-loop channel	stepper motor	25	31.4s	13.5 min	/	/	2uL	16-loci short tandem repeat sample	No	A circular ferrofluid driven microchip for rapid polymerase chain reaction
Static chamber	/	30	10s	<30 min	/	/	100uL	Bacillus anthracis\Bordetella pertussis	no	A fully integrated microfluidic genetic analysis system with sample-in–answer-out capability
Closed-loop channel	pneumatic pump	40	15s	23min	/	/	12nL	human β-actin gene	no	A nanoliter rotary device for polymerase chain reaction
Spiral channel	self-activated micropump	40	50s	≈63min*	/	50 s per cycle.	20uL	H7N9	no	A New Self-Activated Micropumping Mechanism Capable of Continuous-Flow and Real-Time PCR Amplification Inside 3D Spiral Microreactor
Static chamber	peristaltic pump	30	75s	50min	/	1.5 °C/s for heating and −2.0 °C/s cooling	20uL	HPV	no	A Point-of-Need infrared mediated PCR platform with compatible lateral flow strip for HPV detection
Serpentine channel	magnetic field	40	1s	3.6min	/	3.8 cm/s	3uL	GAPDH gene	yes	A simple device using magnetic transportation for droplet-based PCR
Closed-loop channel	thermal gradient	/	42s	20-30min	/	2.1 mm s-1	25uL	human L32 gene\influenza-A virus\λ-DNA template	no	A Pocket-Sized Convective PCR Thermocycler
Serpentine channel	stepper motor	35	40s	13min20s	125 cfu/μl.	100 V/cm	50uL	16S rDNA of periodontal pathogens	no	All-in-one microfluidic device for on-site diagnosis of pathogens based on integrated continuous flow PCR and electrophoresis biochip
Serpentine channel	peristaltic pump	30	10s	＜5min	/	5 uL/min	25uL	mouse GAPDHhousekeeping gene	no	All-plastic, low-power, disposable, continuous-flow PCR chip withintegrated microheaters for rapid DNA amplification
Closed-loop channel	magnetohydrodynamic actuation	20	40s	/	/	750 mm s-1	6uL	rpoB gene of Mycobacterium tuberculosis.	no	Application of magnetohydrodynamic actuation to continuous flow chemistry
Spiral channel	self-activated micropump	40	≈60s	40min*	/	8.5uL/min	40µL	hepatitis B virus	no	Battery Powered Portable Thermal Cycler for Continuous-Flow Polymerase Chain Reaction Diagnosis by Single Thermostatic Thermoelectric Cooler and Open-Loop Controller
Spiral channel	syringe pump	35	120s	71min*	/	0.1 cm/s.	2uL	/	yes	Contamination-Free Continuous Flow Microfluidic Polymerase Chain Reaction for Quantitative and Clinical Applications
Spiral channel	syringe pump	40	60s	＜120min*	10 copies	47µL/min	0.1-10 uL	/	yes	Continuous flow real-time PCR device using multichannel fluorescence excitation and detection
Serpentine channel	hydrostatic pressure	30	/	/	/	0.006 ml/min	/	/	no	Continuous-Flow DNA Amplification Device Employing Microheaters
Serpentine channel	microfluidic pump	40	33s	32min*	10 copies/uL	/	70uL	RNA virus	no	Continuous-flow, microfluidic, qRT-PCR system for RNA virus detection
Spiral channel	syringe pump	33	3.5min	122.5min*	/	0.3 µL/ min	2uL	Promega （bacterial kanamycin resistance gene）		Cylindrical Compact Thermal-Cycling Device for Continuous-Flow Polymerase Chain Reaction
Static chamber	syringe/peristaltic pumps	35	85s	85min	/	heating rate 6°C/s and cooling rate 4°C/s	6uL	β-actin gene	yes	Design and experiment of a PDMS‑based PCR chip with reusable heater of optimized electrode
Spiral channel	syringe pump	27	120s	50min	/	/	10uL	/	yes	Design and fabrication of a two-phase diamond nanoparticle aided fast PCR device
Spiral channel	syringe pump	25	29s	≈15min	/	/	25uL	synthetic pGEM-T vector inserted with a 409 bp gene fragment of the TTF-1 target gene	no	Fabrication of a 3D Teflon microdevice for energy free homogeneous liquid flow inside a long microchannel and its application to continuousflow PCR
Serpentine channel	syringe pump	30	/	＜25min	/	2 μL/min	20uL	C. condimenti and E. coli O157:H7 DNA solutions	no	Fabrication of polymerase chain reaction plastic lab-on-a-chip device for rapid molecular diagnoses
Serpentine channel	syringe pump	20	/	≈20min	0.3×10*4 CFU	2 μL min-1	/	E. coli O157:H7 and Salmonella spp.	no	Glass-Polytetrafluoroethylene-Glass Based Sandwich Microdevice for continuous-flow PCR and
Spiral channel	peristaltic pump	/	/	/	/	3 uL/min	/	/	yes	High-throughput droplet PCR
Static chamber	EWOD-actuation	25	100s	55min	/	heating rate 38.0◦C/s and cooling rate 7.9◦C/s,	15uL	Dengue-II virus	yes	Integrated polymerase chain reaction chips utilizing digital microfluidics
Serpentine channel	peristaltic pump	36	/	≈30min	/	1uL/min	15uL	human cell lines: BC-3 and IBL-1	no	KS-Detect – Validation of Solar Thermal PCR for the Diagnosis of Kaposi’s Sarcoma Using Pseudo-Biopsy Samples
Serpentine channel	syringe pump	25	/	/	/	≤ 1 mL/hr	/	/		Microscale Thermal Gradient Continuous-Flow PCR: A Guide to Operation
Static chamber	charge pump	30	/	/	nmol range	/	1.2nL	S. aureus	yes	Labonchip-An integrated CMOS quantitative-polymerase-chain-reaction lab-on-chip for point-of-care diagnostics
Serpentine channel	Centrifugal force	50	60s	110min*	＜ 10 copies	/	90uL	methicilin-resistant S. aureus37 (MRSA)中的(ExfA) gene		Microstructuring of polymer films for sensitive genotyping by real-time PCR on a centrifugal microfluidic platform
Serpentine channel	syringe pump	40	40s	30-40min	/	water phase 0.4 mL/h and oil phase 1.2 mL/h	50uL	hepatitis B virus (HBV)	no	Miniaturized Continuous-Flow Digital PCR for Clinical-Level Serum Sample Based on the 3D Microfluidics and CMOS Imaging Device
Static chamber	Pneumatic pump	30	75s	47.5min*	/	/	10uL	beta-Actin gene	yes	MULTI-CHAMBER PCR CHIP WITH SIMPLE LIQUID INTRODUCTION
Closed-loop channel	Magnetic force	25	36s	20min	1.63 copies per μL	/	0.5 μL	Bacteriophage lambda	yes	Nested PCR in magnetically actuated circular closed-loop PCR microchip system
Serpentine channel	syringe pump	32	/	/	/	60uL/min；5mm/s	/	/	no	Novel Fabrication Method of a Microfluidic Continuous Flow PCR
Static chamber	/	40	45s	35.5min*	/	20℃/s	100nL	ebola virus	no	Palm-Sized Device for Point-of-Care Ebola Detection
Closed-loop channel	Magnetic force	25	27s	＜13min	/	2.3mm/s	9uL	soya and maize gene	no	Rapid amplification of genetically modified organisms using a circular ferrofluid-driven PCR microchip
Serpentine channel	Centrifugal force	35	150s	89.5min*	/	heating rate 0.7 - 0.8 °C/s and cooling rate 0.9 – 1.0 °C/s	7.5 μ L	Human serum	yes	Rapid and fully automated bacterial pathogen detection on a centrifugal-microfluidic LabDisk using highly sensitive nested PCR with integrated sample preparation
Serpentine channel	syringe pump	35	260s	165min*	/	400µL/min	20uL	C. albicans	no	Rapid Isolation and Concentration of Pathogenic Fungi Using Inertial Focusing on a Chip-Based Platform
Closed-loop channel	piezoelectrically-pumped	35	20s	＜15min	5fg/uL	45 μL/min	200uL	E.coli DNA	yes	Rapid Real-Time Recirculating PCR Using Localized Surface Plasmon Resonance (LSPR) and Piezo-electric Pumping
Serpentine channel	syringe pump	20	5.2s	1.7min	/	1~20 mm/s	/	λ-DNA	no	Rapid PCR in a continuous flow device
Static chamber	motor	30	90s	＜30min	/	/	5uL	SSP150 DNA template	yes	Rapid multi sample DNA amplification using rotary-linear polymerase chain reaction device (PCRDisc)
Serpentine channel	syringe pump	40	45s	40min*	/	1.7~50 µl/min.	50uL	Listeria monocytogenes	no	Real-time PCR detection of Listeria monocytogenes using an integrated microfluidics platform
Spiral channel	syringe pump	30	21s	/	100 copies/mL	4mm/s	55uL	Salmonella enterica,_x000D_ Listeria monocytogenes, Escherichia coli O157:H7 and Staphylococcus aureus	yes	Segmented continuous-flow multiplex polymerase chain reaction microfluidics for high-throughput and rapid foodborne pathogen detection
Serpentine channel	Capillary force	50	/	≈30min	/		50uL	β-actin、AH1pdm influenza virus 、Escherichia coli 、influenza virus H1N1	no	Self-propelled continuous-flow PCR in capillary-driven microfluidic device: Microfluidic behavior and DNA amplification
Serpentine channel	syringe pump	35	≈20s	＜30min	/	0.8 mL/min	10uL	KSHV gene vCyclin	no	Solar thermal polymerase chain reaction for smartphone-assisted molecular diagnostics
In some cases the procedure requires an initial denaturation or final extension process that costs more time than a regular thermal cycle, so the total time is not necessarily the cycle time directly multiplied by the cycle number.
In order to avoid misinterpretation, the cycle time and total time were directly quoted from the reference.
If not,the number was displayed with signal "*"
Calculated or measured flow rate of continuous flow PCR chip, or the temperature changing rate in the case of static PCR chip, was also displayed. The pumping system in some static chip was used to distribute reagents.

## Sheet: isothermal amplification
Amplification methods	Driving force	Limit of detection	Dynamic range	Amplification time	Total time	Detection	Sample volume	Highlights	Target	Reference
LAMP	centrifuge	0.5 copies/μL	0.5~103 copies/μL	60 min	70 min	fluorescence signals	4 μL	RT-LAMP	SARS-CoV-2	A fully automated centrifugal microfluidic system for__sample-to-answer viral nucleic acid testing
LAMP	capillary forces	Cryptococcus DNA：100 fg/μL Cryptococcus yeast suspension：100 CFU/mL	1 ng/μL~100 fg/μL 108~102 CFU/mL	45 min		a gel image analysis system	10μL	lyophilized LAMP reagent	Cryptococcus	A LAMP-based microfluidic module for rapid detection of pathogen in cryptococcal meningitis
LAMP	negative pressure actuation	Escherichia coli：17.15 ng/μL Staphylococcus aureus ：5.67 ng/μL Pseudomonas aeruginosa ：16.47 ng/μL	Escherichia coli：17.15~137.2 ng/μL Staphylococcus aureus ：5.67~34.02 ng/μL Pseudomonas aeruginosa ：16.47~197.58 ng/μL	1h		fluorescence images	20 ng DNA	LAMP multiple detection	Escherichia coli, Staphylococcus aureus, Pseudomonas aeruginosa	A Microfluidic Chip for LAMP-based Multiplex Detection of Pathogen
LAMP	syringe pump	MYSV：11.1 ng/µL CCYV： 9.6 ng/µL	/	20-60 min	60 min	fluorescence images	3.1 µL	LAMP and RT-LAMP	tomato yellow leaf curl virus， melon yellow spot virus, cucurbit chlorotic yellows virus	A Microfluidic Diagnostic Device Capable of Autonomous Sample Mixing and Dispensing for the Simultaneous Genetic Detection of Multiple Plant Viruses
LAMP	centrifugal force	E. coli O157:H7 DNA :0.0134 ng/μL Salmonella spp. in the sample :12 CFU/ mL	/	30 min		gel electrophoresis	10 μL	multiple detections	Escherichia coli, Salmonella spp., Staphylococcus aureus, Vibrio parahaemolyticus	A newly developed paper embedded microchip based on LAMP for rapid multiple detections of foodborne pathogens
LAMP	centrifuge	Sau and Sal ： 102copies/μL Sty, Pae, and Eco ： 101copies/μL	/	50 min	70 min	a color sensor	100 μL	Bacteria lysis, LAMP and color detection，multiple detections	Staphylococcus aureus, Shigella, Pseudomonas aeruginosa, Salmonella, enterotoxigenic Escherichia coli	A portable microfluidic analyzer for integrated bacterial detection using visible loop-mediated amplification
LAMP	capillary forces	PEDV and PDCoV：10 genome copies per reaction TGEV：102 genome copies per reaction	PEDV and PDCoV：10~105 copies per reaction TGEV：102~105 copies per reaction	30 min		fluorescence images	1.4 μL	RT-LAMP	porcine epidemic diarrhea virus, transmissible gastroenteritis virus, porcine deltacoronavirus	A portable, 3D printed, microfluidic device for multiplexed, real time, molecular detection of the porcine epidemic diarrhea virus, transmissible gastroenteritis virus, and porcine deltacoronavirus at the point of need
LAMP	centrifuge	V. parahemolyticus：1.03×10-1 pg/μL V.cholerae：7.00×10-2 pg/μL V. vulnificus：3.28×100 pg/μL Vibrio alginolyticus ：3.62×100 pg/μL Salmonella enterica ：3.00×10-1 pg/μL Shigella flexneri：8.43×100 pg/μL Campylobacter jejuni：4.10×10-1 pg/μL Staphylococcus aureus ：6.14×100 pg/μL Yersinia enterocolitica：3.80×10-1 pg/μL Listeria monocytogenes ：4.17×10-1 pg/μL	7.92×103~9.54×101 pg	35 min		fluorescence images	2μL	multiple detections	Campylobacter jejuni, Listeria monocytogenes, Salmonella enterica, Shigella flexneri, Staphylococcus aureus, Vibrio alginolyticus, V.cholerae, V. parahemolyticus, V. vulnificus, Yersinia enterocolitica	A real-time LAMP-based dual-sample microfluidic chip for rapid and simultaneous detection of multiple waterborne pathogenic bacteria from coastal waters
LAMP	disposable air pumps	RVFV, YFV, DNEV-2, and DENV-4 ： 100 copies CHIKV, JEV, DENV-1, and DENV-3 ： 50 copies.	105~50 copies/μL	45 min	50 min	real-time method and colorimetric method	10 μL	real-time LAMP and colorimetric LAMP	Rift Valley Fever Virus, Chikungunya Virus, Japanese Encephalitis Virus, Yellow Fever Virus, Dengue Virus	A self-powered rapid loading microfluidic chip for vector-borne viruses detection using RT-LAMP
LAMP	centrifuge	103 copies /μL	103~106 copies/μL	30 min		fluorescence images	/	s nucleic acid purification, isothermal amplification and real-time fluorescence detection	HPV	An integrated microfluidic detection system for the automated and rapid diagnosis of high-risk human papillomavirus
LAMP	syringe pumps	1×101 copies/μL	101~104 copies/μL	45 min		fluorescent detection unit	/	digital LAMP	HBV	An LED-Driven AuNPs-PDMS Microfluidic Chip and Integrated Device for the Detection of Digital Loop-Mediated Isothermal DNA Amplification
LAMP	/	S. aureus：2.25 × 103 copies/μl MRSA：5.32 × 103 copies/μl Shigella：2.89 × 103 copies/μl Klebsiella pneumoniae： 6.53 × 102 copies/μl	/	53 min		fluorescence	14.5 μL	LAMP VS qPCR	S. aureus, MRSA, Shigella, Klebsiella pneumoniae	Comparative analysis of loop‐mediated isothermal amplification combined with microfluidic chip technology and q‐PCR in the detection of clinical infectious pathogens
LAMP	swung about three times by hand	100 copies/μL	/	＜45 min		visual inspection	20 μL	Multiplex Detection,visual detection	porcine epidemic diarrhea virus, transmissible gastroenteritis virus, porcine rotavirus, porcine circovirus type 2	Development of a Handheld Microfluidic Chip for On-Site Multiplex Detection of Four Porcine Diarrhea-Related Virus
LAMP	/	50 ng/μL	/	40 min	45 min	fluorescent detection unit	14 μL	Multiplex Detection	carbapenemase-producing organisms	Development of Microfluidic Chip-Based Loop-Mediated Isothermal Amplification (LAMP) Method for Detection of Carbapenemase Producing Bacteria
LAMP	electromagnetically-driven	~5000 copies (i.e. 200 virus/μL)	5 × 104~50 copies per reaction	60 min	82 min	fluorescent detection unit	15 μL	Multiple RT-LAMP	SARS-CoV-2	Electromagnetically-driven integrated microfluidic platform using reverse transcription loop-mediated isothermal amplification for detection of severe acute respiratory syndrome coronavirus 2
LAMP	syringe pump	5 copies/µL	5~500,000 copies/reaction	60 min		fluorescence microscope	1µL	LAMP	a cancer biomarker	Fast Prototyping Microfluidics: Integrating Droplet Digital Lamp for Absolute Quantification of Cancer Biomarkers
LAMP	physical forces	102 PFU/200 μL of whole blood	101~105 PFU/mL	40 min	＜1 hour	fluorescence	2 µL	LAMP	dengue virus	Integrated microsystems for in situ genetic detection of dengue virus in whole blood using direct sample preparation and isothermal amplification
LAMP	capillary action	/	/	30 min		color change	3μL	RT-LAMP	SARS‑CoV‑2	Integration of RT‑LAMP and Microfluidic Technology for Detection of SARS‑CoV‑2 in Wastewater as an Advanced Point‑of‑Care Platform
LAMP	push pressure	5×102 CFU mL-1	5×101 ~5×105 CFU mL-1	60 min	63 min	fluorescent detection unit	120～130μL for 18-well chip and 70～75μL for 10-well chip	LAMP	Edwardsiella tarda and Vibrio harveyi	iso-μmGene:Isothermal amplification-based portable microfluidic system for simple, reliable and flexibly multiplexed Genetic identification and quantification
LAMP	centrifuge and capillary action	10 copies	1E+4,1E+3,1E+2,1E+1 copies	50 min		fluorescent detection unit	2.1µL	RPA-LAMP	SARS-CoV-2, Measles Virus	Microfluidic Chip with Two-Stage Isothermal Amplification Method for Highly Sensitive Parallel Detection of SARS-CoV-2 and Measles Virus
LAMP	centrifuge	PEDV:10 copies/μL;PDCoV:10²copies/μL;SADS-CoV:10²copies/μL	106~100 copies/μL	60 min		fluorescence reading and analysis	14.8μL	RT-LAMP	Porcine epidemic diarrhea virus, porcine deltacoronavirus, swine acute diarrhea syndrome-coronavirus	Microfluidic-RT-LAMP chip for the point-of-care detection of emerging and re-emerging enteric coronaviruses in swine
LAMP	hydrostatic pressure	1.0 ng/µL	10.2 ng/µL down to 1/1000	60 min		spectra；Raman analysis	4 μL	LAMP-SERS	Listeria monocytogenes	Multifuntional Gold Nanoparticles for the SERS Detection of Pathogens Combined with a LAMP–in–Microdroplets Approach
LAMP	centrifuge	a genomic detection limit of 0.05 ng/µL in cow, camel, horse, and goat milk and 0.005 ng/µL in yak milk;adulterated milk samples was 2.5%	8, 5, 0.5, 0.05, 0.005, and 0.0005 ng/µL	90 min		fluorescent	1 mL	LAMP	multiple authentications of milk	Multiple authentications of high-value milk by centrifugal microfluidic chip-based real-time fluorescent LAMP
LAMP	capillary action or wicking on paper	0.34 fg/μL RNA	10~10−4 pg/μL	40 min		naked eye or imaged with a smartphone camera	1 μL	RT-LAMP	prostate cancer 3 biomarker	On-chip RT-LAMP and colorimetric detection of the prostate cancer 3 biomarker with an integrated thermal and imaging box
LAMP	capillary action	whole blood:44.2 CFU mL-1;drinking water:1.57CFU mL-1;milk:5.51 CFU mL-1	0~105 CFU mL-1	45 min		electrochemical interrogation reaction	10 μL	LAMP	Salmonella typhimurium	Origami-based “Book” shaped three-dimensional electrochemical paper microdevice for sample-to-answer detection of pathogens
LAMP	centrifuge	102-103 copies/reaction	10~106 copies/μL	30 min		fluorescent detection unit	10 μL	LAMP	COVID-19	Point-of-care detection of SARS-CoV-2 in nasopharyngeal swab samples using an integrated smartphone-based centrifugal microfluidic platform
LAMP	centrifuge	3.0 log CFU mL-1	2.0~7.0 log CFU mL-1	40 min		fluorescence signal and optoelectronic converter	5 µL	LAMP	Candida albicans	Quantitative and specific detection of viable pathogens on a portable microfluidic chip system by combining improved propidium monoazide(PMAxx) and loop-mediated isothermal amplification (LAMP)
LAMP	syringe pump	S. aureus, S. epidermidis, S. hominis, and methicillin-resistant S. aureus (MRSA) were 20 CFU/reaction；S. haemolyticus was 200 CFU/reaction.	S. aureus,S. epidermidis, S. hominis, MRSA:10,000~10 CFU/µL S. haemolyticus:10,000~100 CFU/µL	50 min	70 min	fluorescence	2 µL	LAMP and microfluidics	S. aureus, S. epidermidis, S. hominis, methicillin-resistant S. aureus, S. haemolyticus	Rapid Detection of mecA and femA Genes by Loop-Mediated Isothermal Amplification in a Microfluidic System for Discrimination of Different Staphylococcal Species and Prediction of Methicillin Resistance
LAMP	centrifuge	10 copies/mL	10~107 copies/μL	40 min		fluorescence	/	LAMP	SARS-CoV, middle east respiratory syndrome coronavirus, SARS-CoV-2, HCoV-229E, HCoV-OC43, HCoV-NL63, HCoV-HKU1	Rapid Differential Diagnosis of Seven Human Respiratory
LAMP	driving the motor	103 to 104 CFU mL-1	5×103～5×106 CFU mL-1	75 min		fluorescence signals	1 μL	real-time LAMP	Vibrio splendidus	Real-time isothermal amplification based portable microfluidic system for simple and reliable detection of Vibrio splendidus
LAMP	magnetic force	500 virions/mL	2.8 × 107~28 virion copies/mL	45 min		naked eye	100 µL	RT-LAMP	HCV	RT-LAMP-Based Molecular Diagnostic Set-Up for Rapid Hepatitis C Virus T esting
LAMP	centrifuge	bacteria DNA 100 to 10–1 pg/μl；viruses DNA 10–4to 10–5pg/μl	bacteria DNA:10-4~10-2 pg/μL, viruses DNA:100~10–6pg/μL	50 min		fluorescence	2 μL	dual-sample,LAMP	Aeromonas hydrophila, Edwardsiella tarda, Vibrio harveyi, V. algino-lyticus, V. anguillarum, V. parahaemolyticus, V. vulnificus, infectious hypodermal, haematopoietic necrosis virus, infectious spleen, kidney necrosis virus	Simultaneous detection of multiple bacterial and viral aquatic pathogens using a fluorogenic loop-mediated isothermal amplification-based dual-sample microfluidic chip
LAMP	syringe pump	100 to 10000 copies/μL	5.5×104~6.3×106 copies/mL	＜30 minutes		fluorescence	6.4 μL	LAMP	Streptococcus equi subspecies equi, Streptococcus equi subspecies zooepidemicus, equine herpesvirus 1, equine herpesvirus 4， equine influenza virus	Smartphone-Based Multiplex 30-minute Nucleic Acid Test of Live Virus from Nasal Swab Extract
LAMP	syringe pump	2 × 101 genome copies/μL	2×101~2×105 copies/μL	1 h		fluorescence signal	2 μL	direct-LAMP	SARS-CoV-2	An internet of things-based point-of-care device for direct reverse-transcription-loop mediated isothermal amplification to identify SARS-CoV-2
LAMP	capillary forces	ASFV synthetic DNAs:30 copies per microliter;mock samples:50 copies per microliter	3000, 300, 100, 50, 30 and 0 copies	40~60 min	＜70 minutes	fluorescence	1 mL	direct-LAMP	African Swine Fever Virus	Multiplex and visual detection of African Swine Fever Virus (ASFV) based on Hive-Chip and direct loop-mediated isothermal amplification
LAMP	syringe pump	102 per chamber	1.32×102~1.32×107 copies	50 min		fluorescence	1 μL	direct-LAMP	E. coli W, S. Typhimurium, V. parahaemolyticus	Quantification of colorimetric isothermal amplification on the smartphone and its open‑source app for point‑of‑care pathogen detection
LAMP	push pressure	14 CFU/mL	1.4×101~1.4×106 CFU/mL	30 min		turbidity of the reaction	250 μL	LAMP	Viable Salmonella	A lab-on-chip device for sample-in-result-out detection of viable Salmonella using loop-mediated isothermal amplification and real-time turbidity monitoring
RPA	/	Singleplex assays：2.5 × 101 DNA copies, Duplex assay：2.5 × 101 DNA copies for khe and 2.5 × 102 DNA copies for blaNDM-1	/	17 min		fluorescence measurements	1 µL	rtRPA	both the organism-specific Klebsiella haemolysin (khe) gene and the New Delhi metallo-β-lactamase 1 (blaNDM-1) gene from ,Klebsiella pneumoniae	3D Printed Monolithic Microreactors for Real-Time Detection of Klebsiella pneumoniae and the Resistance Gene blaNDM-1 by Recombinase Polymerase Amplification
RPA	positioned upright and simply shaken/capillarity	1 copy per μL or 30 copies per sample	/	15 min		lateral flow (LF) strip	30 μL	MI-IF-RPA	COVID-19	A microfluidic-integrated lateral flow recombinase polymerase amplification (MI-IF-RPA) assay for rapid COVID-19 detection
RPA	vacuum-based self-priming introduction	10 bacterial cells for each kind of pathogen	/	30 min		fluorescence measurements	10 μL	integrated multiplex digital recombinase polymerase amplification (ImdRPA)	Escherichia coli, Listeria monocytogenes, Salmonella enterica	A “sample-in-multiplex-digital-answer-out” chip for fast detection of pathogens
RPA	centrifuge	1 copy/μL	/	20 min		fluorescence measurements	75 μL	dual-CRISPR/Cas12a-assisted RT-RAA assay and a microfluidic platform	SARS-CoV-2	Dual-CRISPR/Cas12a-Assisted RT-RAA for Ultrasensitive SARS-CoV-2 Detection on Automated Centrifugal Microfluidics
RPA	centrifuge	S gene：0.68 fM Orf1ab gene：4.16 fM	/	10 min		fluorescence measurements	1 μL	RTRPA，CRISPR/Cas13a	SARS-CoV-2	Automated, portable, and high-throughput fluorescence analyzer (APHF-analyzer) and lateral flow strip based on CRISPR/Cas13a for sensitive and visual detection of SARS-CoV-2
RPA	centrifuge	1.02 × 100 copies/μL	1.02 × 100~2.04 × 103 copies	20 min		fluorescence measurements	2.5 μL	cdRT-RAA	norovirus	Development of a novel RAA-based microfluidic chip for absolute quantitative detection of human norovirus
RPA	/	1 copy/reaction	/	5~10 min		fluorescence measurements	5 μL	digital RPA/hydrogel RPA (gRPA)	L. monocytogenes	Digital recombinase polymerase amplification in hydrogel nanofluidic chip for ultrafast and precise quantification of pathogens in fresh food
RPA	/	human papillomavirus (HPV) 16 DNAs ：10 copies human papillomavirus (HPV) 18 DNAs : 100 copies	/	15 min		fluorescence measurements	/	RPA and CRISPR-Cas12a	HPV	Dynamic Aqueous Multiphase Reaction System for One-Pot CRISPR-Cas12a-Based Ultrasensitive and Quantitative Molecular Diagnosis
RPA	syringe pump	/	/	10~30 min		agarose gel electrophoresis	1 μL	Printed circuit board (PCB) technology	E. coli	Isothermal Recombinase Polymerase Amplification (RPA) of E. coli gDNA in Commercially Fabricated PCB-Based Microfluidic Platforms
HDA	push pressure	10 CFU	105~101 CFU	30 min	50 min	fluorescent reporter	50 ng DNA	HDA and Solid phase extraction	E. coli	An integrated disposable device for DNA extraction and helicase dependent amplification
HDA	/	100 CFU	3 and more than 100,000 CFU per swab	60 min		chip image	5μL	HDA	Staphylococcus aureus	Direct detection of nasal Staphylococcus aureus carriage via helicase-dependent isothermal amplification and chip hybridization
HDA	/	1 CFU	1~250 CFU per reaction	45 min	＜75 min	colorimetric intensity changes	2 μL	HDA	mecA Gene	Staph ID/R: a Rapid Method for Determining Staphylococcus Species Identity and Detecting the mecA Gene Directly from Positive Blood Culture
HDA	/	1.25×10-2 pg	125~2.5×10-3 pg	30 min	45 min	Polyacrylamide Gel Analysis	5 mL	HDA	Clostridium difficile	Low Cost Extraction and Isothermal Amplification of DNA for Infectious Diarrhea Diagnosis
HDA	syringe pumps	10 cells	below 500 cells	30 min	＜86 min	gel electrophoresis	100 μL	HDA	foodborne pathogen	A modular integrated lab-on-a-chip platform for fast and highly efficient sample preparation for foodborne pathogen screening
